# Supplementary material for: A conserved role for Syntaxin-1 in pre- and post-commissural midline axonal guidance in fly, chick, and mouse
Source: PubMed Central journal article supplement (PMC6029812; doi:10.1371/journal.pgen.1007432), 2018-06-18

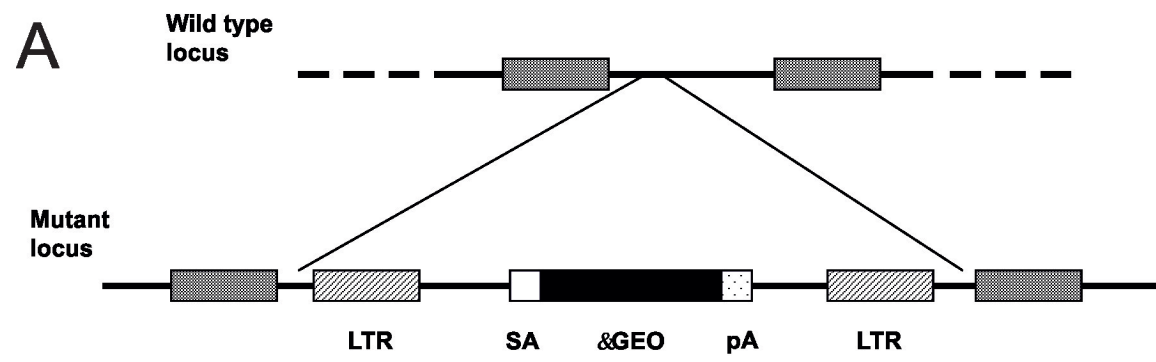

**Mutation Illustration**

Accession: NM\_024414

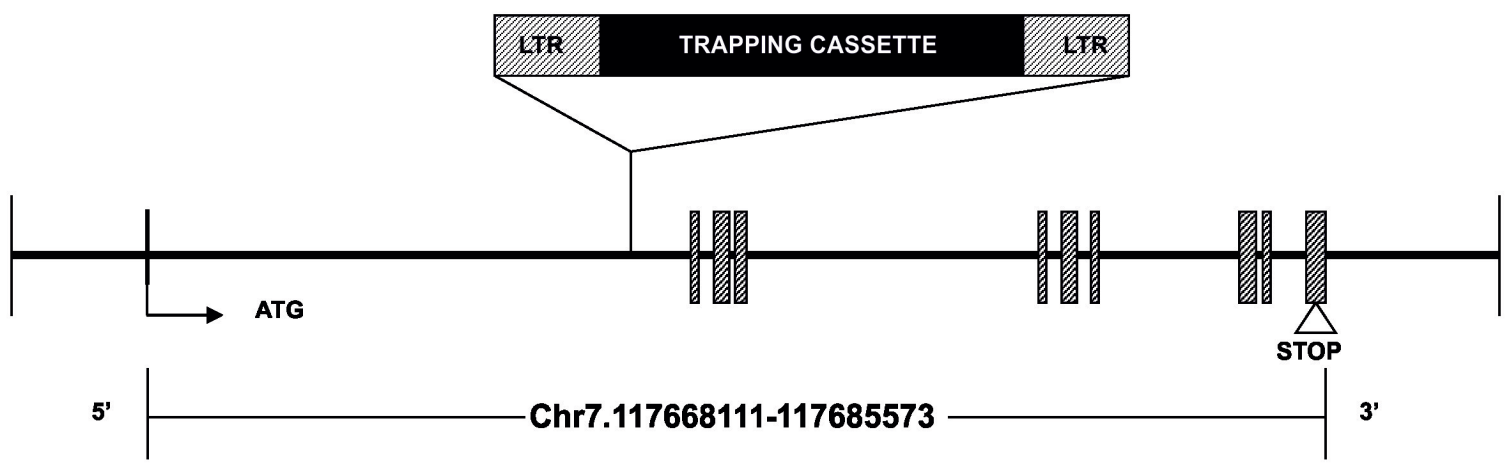

(+/+) ( +/- ) ( -/- )

WT KO1 KO2 WT KO1 KO2 WT KO1 KO2

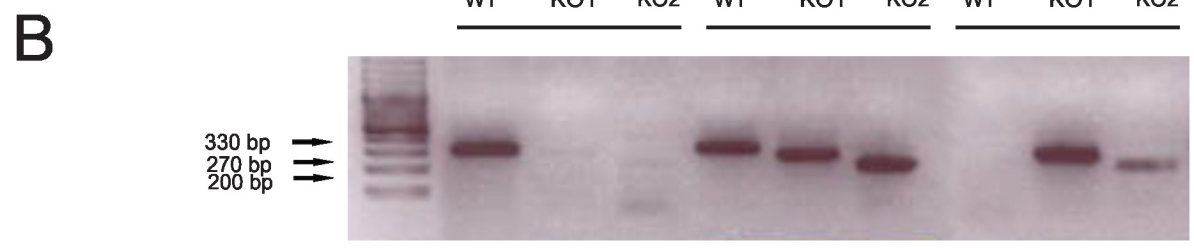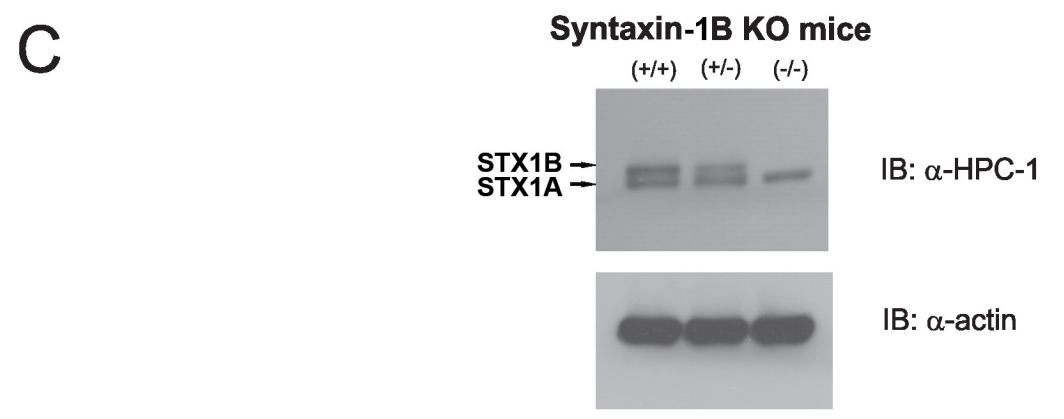

Supplement: pgen.1007432.s001.pdf [file pgen.1007432.s001.pdf]
